# Supplementary material
Source: publisher site journal article supplement (https://www.dovepress.com/article/330787)
Supplement: Supplementary file 1 [file get_supplementary_file.php]

Table S1. Identified virulence genes in the three NDM-5-producing *Enterobacteriaceae* strains.

|              | SCLZR49 | SCLZR50 | SCLZR53 |                                        |
|--------------|---------|---------|---------|----------------------------------------|
| <i>tviC</i>  | Yellow  |         | Green   | Vi polysaccharide gene cluster         |
| <i>tviD</i>  | Yellow  |         | Green   |                                        |
| <i>tviE</i>  | Yellow  |         | Green   |                                        |
| <i>vexD</i>  | Yellow  |         | Green   |                                        |
| <i>vexA</i>  | Yellow  |         | Green   |                                        |
| <i>vexB</i>  | Yellow  |         | Green   |                                        |
| <i>vexC</i>  | Yellow  |         | Green   |                                        |
| <i>tssJ</i>  |         | Blue    |         | type VI secretion system gene cluster  |
| <i>tssC</i>  | Yellow  |         | Green   |                                        |
| <i>tssF</i>  | Yellow  |         | Green   |                                        |
| <i>tssM</i>  | Yellow  |         | Green   |                                        |
| <i>tssG</i>  |         | Blue    |         |                                        |
| <i>tssF</i>  |         | Blue    |         |                                        |
| <i>fepA</i>  | Yellow  | Blue    | Green   | enterobactin                           |
| <i>fepC</i>  | Yellow  | Blue    |         |                                        |
| <i>fepG</i>  | Yellow  | Blue    |         |                                        |
| <i>fepD</i>  |         | Blue    |         |                                        |
| <i>fepB</i>  |         | Blue    |         |                                        |
| <i>entF</i>  | Yellow  | Blue    |         |                                        |
| <i>entE</i>  | Yellow  | Blue    |         |                                        |
| <i>entC</i>  | Yellow  | Blue    |         |                                        |
| <i>entS</i>  | Yellow  |         |         |                                        |
| <i>entB</i>  | Yellow  | Blue    |         |                                        |
| <i>entD</i>  | Yellow  | Blue    |         |                                        |
| <i>entA</i>  |         | Blue    |         |                                        |
| <i>fes</i>   | Yellow  | Blue    |         |                                        |
| <i>ybdA</i>  |         | Blue    |         |                                        |
| <i>fimA</i>  |         | Blue    |         | type 1 pilus gene cluster              |
| <i>fimD</i>  | Yellow  | Blue    |         |                                        |
| <i>fimH</i>  | Yellow  | Blue    |         |                                        |
| <i>fimC</i>  | Yellow  |         |         |                                        |
| <i>fimE</i>  | Yellow  | Blue    |         |                                        |
| <i>fimI</i>  | Yellow  | Blue    |         |                                        |
| <i>fimB</i>  | Yellow  |         |         |                                        |
| <i>fimF</i>  | Yellow  | Blue    |         |                                        |
| <i>fimG</i>  | Yellow  | Blue    |         |                                        |
| <i>espL1</i> | Yellow  |         |         | type III secretion system gene cluster |
| <i>espX4</i> | Yellow  |         |         |                                        |
| <i>espX5</i> | Yellow  |         |         |                                        |
| <i>espL4</i> | Yellow  |         |         |                                        |

|                 |  |  |  |                                                 |
|-----------------|--|--|--|-------------------------------------------------|
| <i>espR1</i>    |  |  |  |                                                 |
| <i>espX1</i>    |  |  |  |                                                 |
| <i>gspD</i>     |  |  |  | general secretion pathway gene cluster          |
| <i>gspE</i>     |  |  |  |                                                 |
| <i>gspF</i>     |  |  |  |                                                 |
| <i>gspK</i>     |  |  |  |                                                 |
| <i>gspL</i>     |  |  |  |                                                 |
| <i>gspC</i>     |  |  |  |                                                 |
| <i>gspJ</i>     |  |  |  |                                                 |
| <i>gspH</i>     |  |  |  |                                                 |
| <i>gspG</i>     |  |  |  |                                                 |
| <i>gspM</i>     |  |  |  |                                                 |
| <i>ecpA</i>     |  |  |  |                                                 |
| <i>ecpB</i>     |  |  |  |                                                 |
| <i>ecpR</i>     |  |  |  |                                                 |
| <i>ecpC</i>     |  |  |  |                                                 |
| <i>ecpD</i>     |  |  |  |                                                 |
| <i>mrkA</i>     |  |  |  | type 3 fimbriae gene cluster                    |
| <i>mrkB</i>     |  |  |  |                                                 |
| <i>mrkC</i>     |  |  |  |                                                 |
| <i>mrkD</i>     |  |  |  |                                                 |
| <i>mrkF</i>     |  |  |  |                                                 |
| <i>mrkI</i>     |  |  |  |                                                 |
| <i>mrkJ</i>     |  |  |  |                                                 |
| <i>mrkH</i>     |  |  |  |                                                 |
| <i>manC</i>     |  |  |  | contribute to capsule formation                 |
| <i>manB</i>     |  |  |  |                                                 |
| <i>gnd</i>      |  |  |  |                                                 |
| <i>ugd</i>      |  |  |  |                                                 |
| <i>galF</i>     |  |  |  |                                                 |
| <i>rcsA</i>     |  |  |  |                                                 |
| <i>rcsB</i>     |  |  |  |                                                 |
| <i>wzi</i>      |  |  |  |                                                 |
| <i>cpsACP</i>   |  |  |  |                                                 |
| <i>acrA</i>     |  |  |  | acriflavine resistance proteins                 |
| <i>acrB</i>     |  |  |  |                                                 |
| <i>kpsE</i>     |  |  |  | group 3 capsular polysaccharide export proteins |
| <i>kpsM-K11</i> |  |  |  |                                                 |
| <i>chuA</i>     |  |  |  | outer membrane heme/hemoglobin receptor         |
| <i>sitA</i>     |  |  |  | iron transport protein                          |
| <i>iroE</i>     |  |  |  | siderophore esterase                            |
| <i>ompA</i>     |  |  |  | outer membrane protein A                        |

|             |  |  |  |                                              |
|-------------|--|--|--|----------------------------------------------|
| <i>hlyF</i> |  |  |  | hemolysin F                                  |
| <i>fdeC</i> |  |  |  | adhesin FdeC                                 |
| <i>terC</i> |  |  |  | tellurium ion resistance protein             |
| <i>traT</i> |  |  |  | outer membrane protein complement resistance |
| <i>iutA</i> |  |  |  | aerobactin transport                         |
| <i>ompT</i> |  |  |  | outer membrane protease                      |
| <i>gad</i>  |  |  |  | glutamate decarboxylase                      |
| <i>papC</i> |  |  |  | outer membrane usher P fimbriae              |
| <i>allB</i> |  |  |  | allantoinase                                 |
